# Supplementary material for: Modification of Glassy Carbon Electrodes with Complexes of Manganese(II) with Some Phenanthroline Derivatives Immobilized in Nafion Layer
Source: MDPI journal article supplement (doi:10.3390/ijms25042348), 2024-02-16
Supplement: s1 [file s1]

Modification of Glassy Carbon Electrodes with Complexes of Manganese(II) with some Phenanthroline Derivatives immobilised in Nafion layer

D. Tomczyk\*, P. Seliger

Scheme

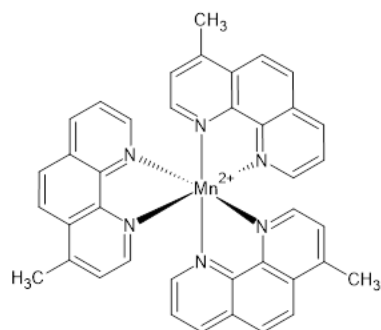

Scheme S1. Structure of  $[\text{Mn}(4\text{-CH}_3\text{-phen})_3]^{2+}$ .

Figures

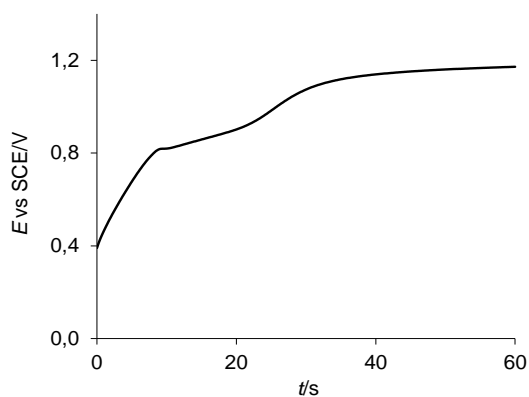

Figure S1. Chronopotentiometric curve for the conventional GCE modified with  $[\text{Mn}(4\text{-CH}_3\text{-phen})_2(\text{H}_2\text{O})_2](\text{ClO}_4)_2$  immobilized in Nafion layer recorded in  $0.1 \text{ mol dm}^{-3}$  potassium nitrate for  $I = 10^{-5} \text{ A}$ .  $T = 295 \text{ K}$ .

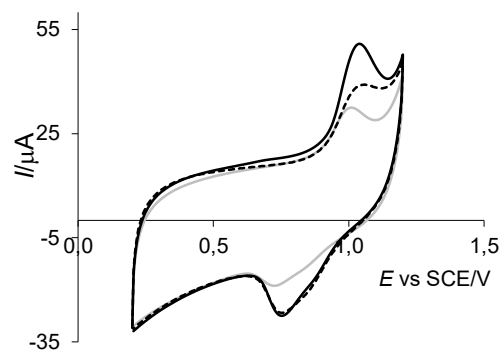

Figure S2. A comparison of voltammetric curves recorded for an electrode modified with  $[\text{Mn}(5\text{-Cl}_2\text{-phen})_3](\text{ClO}_4)_2$  immobilized in Nafion layer on GCE in potassium nitrate solution (grey line) and potassium nitrate with addition of ascorbic acid (black line) and glycolic acid (dashed line) , scan rate  $50 \text{ mV s}^{-1}$ ,  $T = 295 \text{ K}$ .

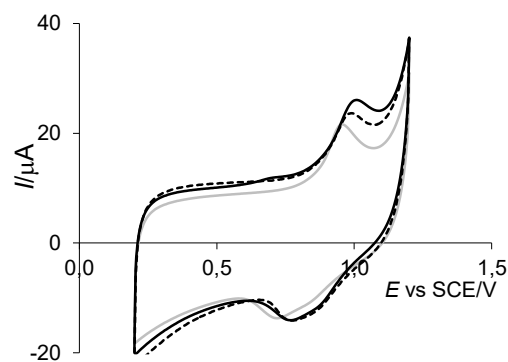

Figure S3. A comparison of voltammetric curves recorded for an electrode modified with  $[\text{Mn}(5\text{-CH}_3\text{-phen})_3](\text{ClO}_4)_2$  immobilized in Nafion layer on GCE in potassium nitrate solution (grey line) and potassium nitrate with addition of ascorbic acid (black line) and glycolic acid (dashed line) , scan rate  $50 \text{ mV s}^{-1}$ ,  $T = 295 \text{ K}$ .

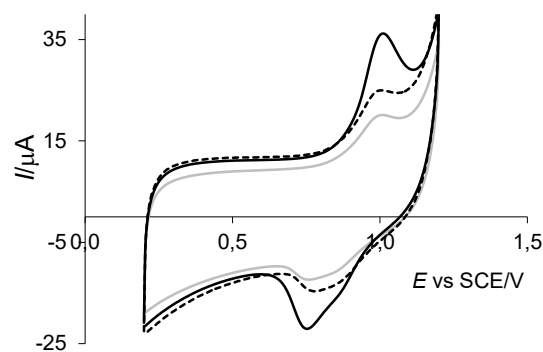

Figure S4. A comparison of voltammetric curves recorded for an electrode modified with  $[\text{Mn}(5\text{-NO}_2\text{-phen})_3](\text{ClO}_4)_2$  immobilized in Nafion layer on GCE in potassium nitrate solution (grey line) and potassium nitrate with addition of ascorbic acid (black line) and glycolic acid (dashed line) , scan rate  $50 \text{ mV s}^{-1}$ ,  $T = 295 \text{ K}$ .

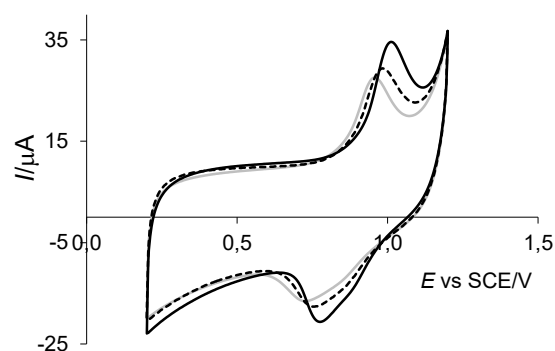

Figure S5. A comparison of voltammetric curves recorded for an electrode modified with  $[\text{Mn}(4,7\text{-CH}_3\text{-phen})_3](\text{ClO}_4)_2$  immobilized in Nafion layer on GCE in potassium nitrate solution (grey line) and potassium nitrate with addition of ascorbic acid (black line) and glycolic acid (dashed line) , scan rate  $50 \text{ mV s}^{-1}$ ,  $T = 295 \text{ K}$ .

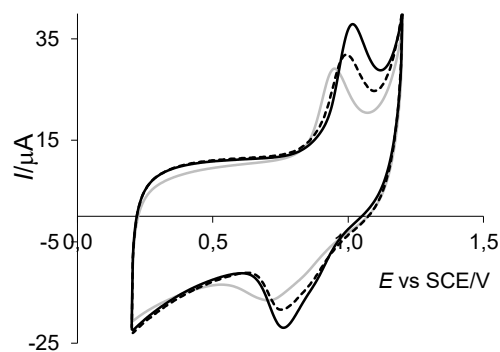

Figure S6. A comparison of voltammetric curves recorded for an electrode modified with  $[\text{Mn}(5,6\text{-CH}_3\text{-phen})_3](\text{ClO}_4)_2$  immobilized in Nafion layer on GCE in potassium nitrate solution (grey line) and potassium nitrate with addition of ascorbic acid (black line) and glycolic acid (dashed line) , scan rate  $50 \text{ mV s}^{-1}$ ,  $T = 295 \text{ K}$ .

## Tables

Table S1. Formal potentials  $E_f^0$  (vs. SCE) of Mn(III)/Mn(II) couple involved in complexes with phenanthroline and its derivatives immobilised in Nafion layer.

| Complex                                                                                                       | $E_f^0/V$ | Complex                                                                       | $E_f^0/V$ |
|---------------------------------------------------------------------------------------------------------------|-----------|-------------------------------------------------------------------------------|-----------|
| [Mn(phen) <sub>2</sub> (H <sub>2</sub> O) <sub>2</sub> ](ClO <sub>4</sub> ) <sub>2</sub> <sup>a</sup>         | 0,92±0.04 | [Mn(phen) <sub>3</sub> ](ClO <sub>4</sub> ) <sub>2</sub> <sup>a</sup>         | 0,86±0.04 |
| [Mn(4-CH <sub>3</sub> -phen) <sub>2</sub> (H <sub>2</sub> O) <sub>2</sub> ](ClO <sub>4</sub> ) <sub>2</sub>   | 0,90±0.04 | [Mn(4-CH <sub>3</sub> -phen) <sub>3</sub> ](ClO <sub>4</sub> ) <sub>2</sub>   | 0,88±0.04 |
| [Mn(5-CH <sub>3</sub> -phen) <sub>2</sub> (H <sub>2</sub> O) <sub>2</sub> ](ClO <sub>4</sub> ) <sub>2</sub>   | 0,89±0.04 | [Mn(5-CH <sub>3</sub> -phen) <sub>3</sub> ](ClO <sub>4</sub> ) <sub>2</sub>   | 0,87±0.04 |
| [Mn(5-Cl-phen) <sub>2</sub> (H <sub>2</sub> O) <sub>2</sub> ](ClO <sub>4</sub> ) <sub>2</sub>                 | 0,88±0.03 | [Mn(5-Cl-phen) <sub>3</sub> ](ClO <sub>4</sub> ) <sub>2</sub>                 | 0,90±0.04 |
| [Mn(5-NO <sub>2</sub> -phen) <sub>2</sub> (H <sub>2</sub> O) <sub>2</sub> ](ClO <sub>4</sub> ) <sub>2</sub>   | 0,90±0.04 | [Mn(5-NO <sub>2</sub> -phen) <sub>3</sub> ](ClO <sub>4</sub> ) <sub>2</sub>   | 0,88±0.03 |
| [Mn(4,7-CH <sub>3</sub> -phen) <sub>2</sub> (H <sub>2</sub> O) <sub>2</sub> ](ClO <sub>4</sub> ) <sub>2</sub> | 0,89±0.04 | [Mn(4,7-CH <sub>3</sub> -phen) <sub>3</sub> ](ClO <sub>4</sub> ) <sub>2</sub> | 0,90±0.04 |
| [Mn(5,6-CH <sub>3</sub> -phen) <sub>2</sub> (H <sub>2</sub> O) <sub>2</sub> ](ClO <sub>4</sub> ) <sub>2</sub> | 0,87±0.03 | [Mn(5,6-CH <sub>3</sub> -phen) <sub>3</sub> ](ClO <sub>4</sub> ) <sub>2</sub> | 0,90±0.04 |

<sup>a</sup> data from [24]

Table S2. Complex concentrations calculated from chronocoulometric curves recorded on microelectrode in mixed diffusion conditions.

| Complex                                                                            | $c \cdot 10^5 / \text{mol cm}^{-3}$ |
|------------------------------------------------------------------------------------|-------------------------------------|
| $[\text{Mn}(\text{phen})_2(\text{H}_2\text{O})_2](\text{ClO}_4)_2^{\text{a}}$      | $3.8 \pm 0.4$                       |
| $[\text{Mn}(\text{phen})_3](\text{ClO}_4)_2^{\text{a}}$                            | $2.7 \pm 0.3$                       |
| $[\text{Mn}(4\text{-CH}_3\text{-phen})_2(\text{H}_2\text{O})_2](\text{ClO}_4)_2$   | $2.3 \pm 0.3$                       |
| $[\text{Mn}(4\text{-CH}_3\text{-phen})_3](\text{ClO}_4)_2$                         | $4.0 \pm 0.5$                       |
| $[\text{Mn}(5\text{-CH}_3\text{-phen})_2(\text{H}_2\text{O})_2](\text{ClO}_4)_2$   | $3.1 \pm 0.4$                       |
| $[\text{Mn}(5\text{-CH}_3\text{-phen})_3](\text{ClO}_4)_2$                         | $3.3 \pm 0.4$                       |
| $[\text{Mn}(5\text{-Cl-phen})_2(\text{H}_2\text{O})_2](\text{ClO}_4)_2$            | $2.2 \pm 0.3$                       |
| $[\text{Mn}(5\text{-Cl-phen})_3](\text{ClO}_4)_2$                                  | $3.0 \pm 0.4$                       |
| $[\text{Mn}(5\text{-NO}_2\text{-phen})_2(\text{H}_2\text{O})_2](\text{ClO}_4)_2$   | $3.5 \pm 0.4$                       |
| $[\text{Mn}(5\text{-NO}_2\text{-phen})_3](\text{ClO}_4)_2$                         | $2.1 \pm 0.3$                       |
| $[\text{Mn}(4,7\text{-CH}_3\text{-phen})_2(\text{H}_2\text{O})_2](\text{ClO}_4)_2$ | $2.1 \pm 0.3$                       |
| $[\text{Mn}(4,7\text{-CH}_3\text{-phen})_3](\text{ClO}_4)_2$                       | $3.2 \pm 0.4$                       |
| $[\text{Mn}(5,6\text{-CH}_3\text{-phen})_2(\text{H}_2\text{O})_2](\text{ClO}_4)_2$ | $1.1 \pm 0.4$                       |
| $[\text{Mn}(5,6\text{-CH}_3\text{-phen})_3](\text{ClO}_4)_2$                       | $1.2 \pm 0.4$                       |

<sup>a</sup> data from [25]

Table S3. The  $I\tau^{1/2}$  dependence for  $[\text{Mn}(4\text{-CH}_3\text{-phen})_2(\text{H}_2\text{O})_2](\text{ClO}_4)_2$  immobilized in Nafion layer calculated from potentiometric measurements.

| $I/\text{A}$      | $\tau/\text{s}$ | $I\tau^{1/2}/\text{A s}^{1/2}$ |
|-------------------|-----------------|--------------------------------|
| $10^{-5}$         | $13.5 \pm 0,9$  | $3,7 \cdot 10^{-5}$            |
| $2 \cdot 10^{-5}$ | $8.2 \pm 0,7$   | $5,7 \cdot 10^{-5}$            |
| $4 \cdot 10^{-5}$ | $4.1 \pm 0,4$   | $8,0 \cdot 10^{-5}$            |
| $8 \cdot 10^{-5}$ | $1.6 \pm 0,2$   | $10,1 \cdot 10^{-5}$           |
| $10^{-4}$         | $1.3 \pm 0,1$   | $11,4 \cdot 10^{-5}$           |
